# Supplementary material
Source: PubMed Central journal article supplement (PMC1765442)
Supplement: pnas_0603420103_4.pdf [file pnas_0603420103_4.pdf]

**SUPPLEMENTARY TABLE 1. Complement profiles in members of families PER and BRA.**

|            | Status        | C3 <sup>1,2</sup><br>(77-210mg/dL) | C4 <sup>2</sup><br>(14-47mg/dL) | Factor H <sup>3</sup><br>(12-56mg/dL) | Factor B <sup>3</sup><br>(7.5-28mg/dL) | Factor I <sup>3</sup><br>(75-115 %) | MCP <sup>4</sup><br>(91-109%) |      |
|------------|---------------|------------------------------------|---------------------------------|---------------------------------------|----------------------------------------|-------------------------------------|-------------------------------|------|
| PER        | I-2           | Healthy                            | 68                              | 24                                    | 38                                     | 15                                  | n.a.                          | n.a. |
|            | II-5          | Healthy                            | 75                              | 25                                    | 37                                     | 16                                  | n.a.                          | n.a. |
|            | II-7 (H55P)   | Affected                           | 46                              | 29                                    | 36                                     | 17                                  | 118                           | 100  |
|            | II-10         | Healthy                            | 122                             | 28                                    | 35                                     | 22                                  | n.a.                          | 121  |
|            | II-11         | Healthy                            | 123                             | 28                                    | 38                                     | 26                                  | n.a.                          | n.a. |
|            | III-7 (H55)   | Affected                           | 91                              | 36                                    | 32                                     | 16                                  | 104                           | 110  |
|            | III-12        | Healthy                            | 67                              | 16                                    | 42                                     | 13                                  | n.a.                          | n.a. |
|            | III-13 (H 85) | Affected                           | 60                              | 19                                    | 23                                     | 12                                  | 98                            | 118  |
|            | III-14        | Healthy                            | 117                             | 21                                    | 33                                     | 12                                  | n.a.                          | 98   |
|            | IV-1          | Healthy                            | 134                             | 17                                    | 27                                     | 15                                  | n.a.                          | n.a. |
|            | IV-2 (H 112)  | Affected                           | 65                              | 25                                    | 24                                     | 22                                  | 95                            | 66   |
|            | BRA           | I-1                                | Healthy                         | 102                                   | 28                                     | 38                                  | 11                            | 84   |
| I-2        |               | Healthy                            | 89                              | 28                                    | 28                                     | 12                                  | 85                            | n.a. |
| II-1 (H21) |               | Affected                           | 23                              | 32                                    | 26                                     | 21                                  | 103                           | 84   |

- 1) Normal range of variation in controls for each variable is shown between brackets.
- 2) C3 and C4 were determined by nephelometry.
- 3) Factor H, Factor B and Factor I plasma levels were determined by ELISA. Factor I levels are referred to a reference serum; each value corresponds to the mean of three independent determinations.
- 4) Levels of MCP in PBLs (MFI, mean fluorescence intensity) were determined by flow cytometry and referred to a series of control samples drawn and analysed the same day. The average MFI value for the control samples was set to 100%. Range of variation for all control samples (n=17) was within 10% of the average value (91 to 109%).
- 5) Pedigree codes as in Figure 2. *BF* mutation carriers are labelled with black triangles. HUS patients are identified by their code in parenthesis.
- 6) n.a.: not available.
