# Supplementary material
Source: PubMed Central journal article supplement (PMC1765442)
Supplement: pnas_0603420103_5.pdf [file pnas_0603420103_5.pdf]

SUPPLEMENTARY TABLE 2. *CFH* and *MCP* SNPs haplotype blocks and disease status in carriers of *BF* mutations.

|                |               | <i>CFH</i><br>-257C>T | <i>CFH</i><br>c.994C>A | <i>CFH</i><br>C.2089A>G | <i>CFH</i><br>C.2881G>T | <i>MCP</i><br>-547A>G | <i>MCP</i><br>-261A>G | <i>MCP</i><br>IVS9-78G>A | <i>MCP</i><br>IVS12+638G>A | <i>MCP</i><br>c.2232T>C | Disease status<br>(age at onset;<br>current age) |
|----------------|---------------|-----------------------|------------------------|-------------------------|-------------------------|-----------------------|-----------------------|--------------------------|----------------------------|-------------------------|--------------------------------------------------|
| PER (F286L)    | I-2           | T                     | C                      | A                       | G                       | A                     | A                     | G                        | G                          | T                       | Healthy<br>(88)                                  |
|                |               | T                     | C                      | A                       | G                       | A                     | A                     | G                        | G                          | T                       |                                                  |
|                | II-5          | T                     | C                      | A                       | G                       | A                     | A                     | G                        | G                          | T                       | Healthy<br>(60)                                  |
|                |               | C                     | A                      | A                       | G                       | A                     | A                     | G                        | G                          | T                       |                                                  |
|                | II-7 (HUS55P) | T                     | C                      | A                       | G                       | A                     | A                     | G                        | G                          | T                       | Affected<br>(48y; 59y)                           |
|                |               | C                     | A                      | A                       | G                       | G                     | G                     | A                        | A                          | C                       |                                                  |
|                | II-9 (HUS85P) | T                     | C                      | A                       | G                       | A                     | A                     | G                        | G                          | T                       | Affected<br>(35y; deceased)                      |
|                |               | C                     | A                      | A                       | G                       | G                     | G                     | A                        | A                          | C                       |                                                  |
|                | III-7 (HUS55) | C                     | A                      | A                       | G                       | G                     | G                     | A                        | A                          | C                       | Affected<br>(23y; 34y)                           |
| T              |               | C                     | G                      | T                       | G                       | G                     | A                     | A                        | C                          |                         |                                                  |
| III-12         | T             | C                     | A                      | G                       | A                       | A                     | G                     | G                        | T                          | Healthy<br>(20)         |                                                  |
|                | T             | C                     | G                      | T                       | A                       | A                     | G                     | G                        | T                          |                         |                                                  |
| III-13 (HUS85) | C             | C                     | A                      | G                       | A                       | A                     | G                     | G                        | C                          | Affected<br>(2y; 29y)   |                                                  |
|                | C             | A                     | A                      | G                       | G                       | G                     | A                     | A                        | C                          |                         |                                                  |
| IV-1           | T             | C                     | G                      | T                       | A                       | A                     | G                     | G                        | T                          | Healthy<br>(15y)        |                                                  |
|                | C             | C                     | A                      | G                       | G                       | G                     | A                     | A                        | C                          |                         |                                                  |
| IV-2 (HUS112)  | T             | C                     | G                      | T                       | G                       | A                     | G                     | G                        | T                          | Affected<br>(4mo; 9mo)  |                                                  |
|                | C             | A                     | A                      | G                       | G                       | G                     | A                     | A                        | C                          |                         |                                                  |
| BRA (K323E)    | II-1 (HUS21)  | T                     | C                      | G                       | T                       | A                     | A                     | G                        | G                          | T                       | Affected<br>(4mo; 6y)                            |
|                |               | C                     | A                      | A                       | G                       | G                     | G                     | A                        | A                          | C                       |                                                  |
