# Supplementary material
Source: PubMed Central journal article supplement (PMC1765442)

a)

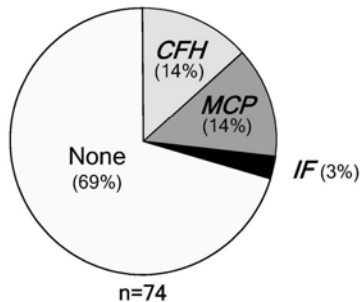

b)

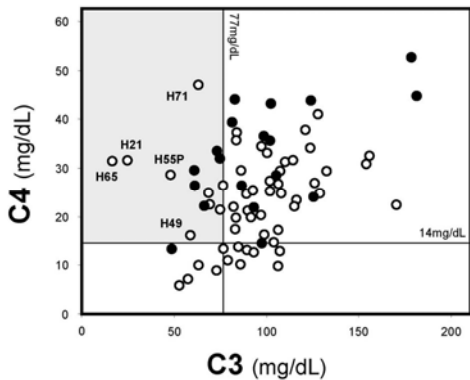

c)

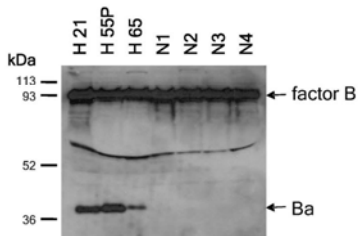

Supplement: pnas_0603420103_1.pdf [file pnas_0603420103_1.pdf]

WT F268L K323E

kDa

111

93

53

36

WT F268L K323E

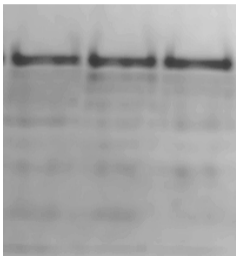

Coomassie

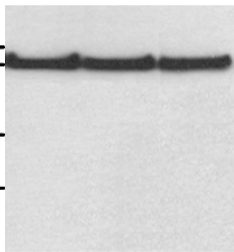

Western Blot

Supplement: pnas_0603420103_2.pdf [file pnas_0603420103_2.pdf]

MWM

WT(plasma)

rWT

r323E

r279G

r286L

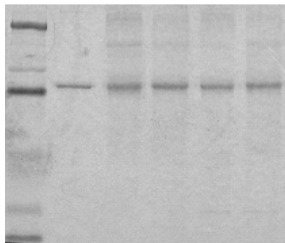

Silver Stain

MWM

WT(plasma)

rWT

r323E

r279G

r286L

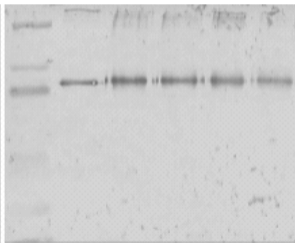

Western Blot

Supplement: pnas_0603420103_3.pdf [file pnas_0603420103_3.pdf]
